# Supplementary material for: Correlation of the changes in the framework and active Cu sites for typical Cu/CHA zeolites (SSZ-13 and SAPO-34) during hydrothermal aging
Source: Royal Society of Chemistry journal article supplement (doi:10.1039/c5cp05128b), 2015-01-01
Supplement: c5cp05128b1.pdf [file c5cp05128b1.pdf]

## Supporting Information

### Correlation of the Changes in Framework and Active Cu sites for Typical Cu/CHA Zeolite (SSZ-13 & SAPO-34) During Hydrothermal Aging

*Wenkang Su,<sup>a</sup> Zhenguo Li,<sup>a</sup> Yue Peng,<sup>a</sup> Junhua Li<sup>\*a</sup>*

<sup>a</sup> State Key Joint Laboratory of Environment Simulation and Pollution Control,

School of Environment, Tsinghua University, Beijing 100084, P. R. China

---

\* Corresponding author. Tel.: +86 10 62771093, fax: +86 10 62771093.  
E-mail address: lijunhua@tsinghua.edu.cn (J. Li).

## N<sub>2</sub> Physical Adsorption.

The surface area and volume of micropore were preserved for SAPO-34 after hydrothermal aging, while the decrease was 58 m<sup>2</sup>/g and 0.02 cm<sup>3</sup>/g for the surface area and volume of micropore of aged Cu/SSZ-13. It demonstrated that SAPO-34 showed greater stability than SSZ-13 during hydrothermal aging process.

Table S1 Pore structure properties of H/CHA and Cu/CHA before and after aging at 800 °C

| Catalysts               | Cu content (wt%) | Specific surface area of micropore (m <sup>2</sup> /g) | Micropore volume (cm <sup>3</sup> /g) |
|-------------------------|------------------|--------------------------------------------------------|---------------------------------------|
| H/SAPO-34 (Fresh)       | 0                | 693                                                    | 0.25                                  |
| H/SAPO-34 (800 °C,12h)  | 0                | 603                                                    | 0.24                                  |
| Cu/SAPO-34 (Fresh)      | 2                | 544                                                    | 0.2                                   |
| Cu/SAPO-34 (800 °C,12h) | 2                | 540                                                    | 0.2                                   |
| H/SSZ-13 (Fresh)        | 0                | 754                                                    | 0.27                                  |
| H/SSZ-13 (800 °C,12h)   | 0                | 662                                                    | 0.25                                  |
| Cu/SSZ-13 (Fresh)       | 2                | 723                                                    | 0.26                                  |
| Cu/SSZ-13 (800 °C,12h)  | 2                | 665                                                    | 0.24                                  |

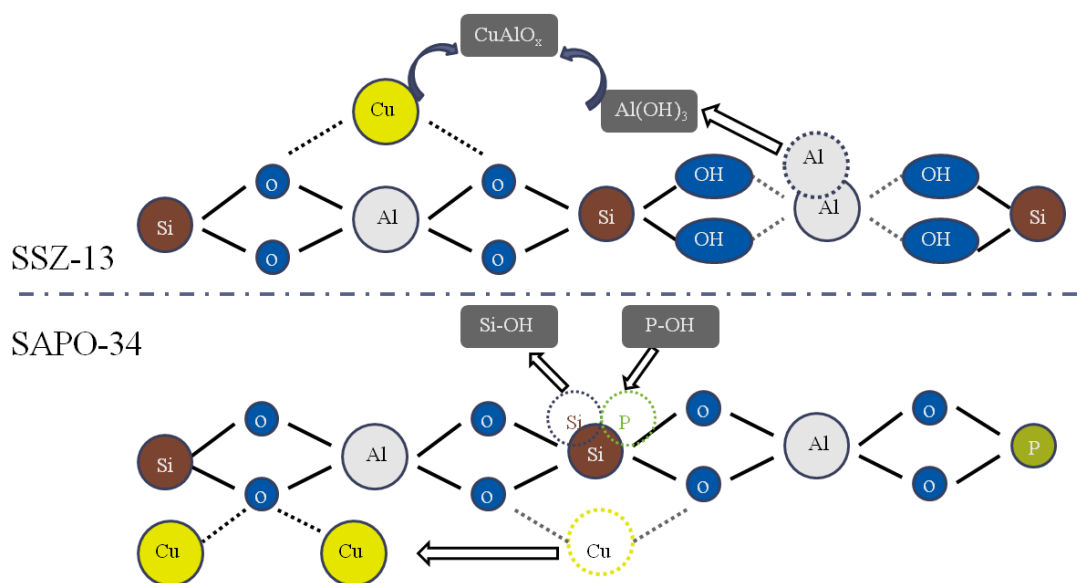

Figure S1. Schematic diagram about the variation of framework and Cu species of Cu/SAPO-34 and Cu/SSZ-13 during hydrothermal aging.

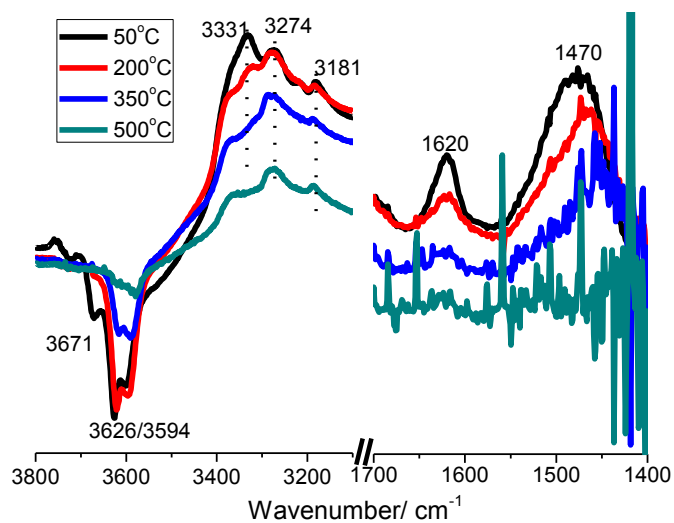

Figure S2. DRIFTS spectra obtained during NH<sub>3</sub>-TPD after the Cu/SAPO-34 had been exposed to 500 ppm NH<sub>3</sub>/N<sub>2</sub>, followed by a N<sub>2</sub> purge.

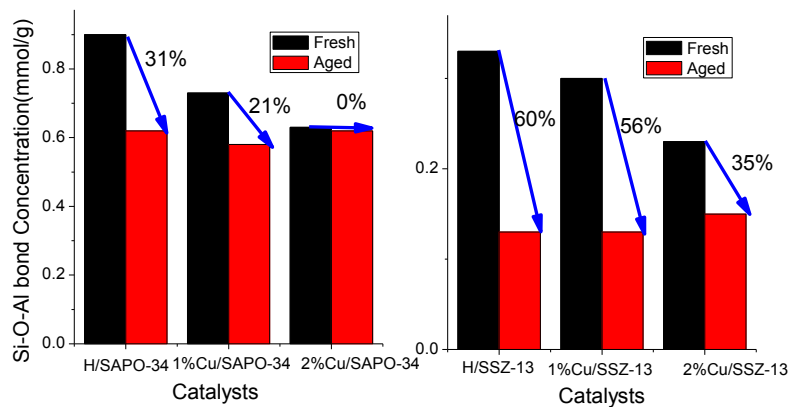

Figure S3. Si-O-Al bond concentration of fresh and aged (at 800 °C) H(Cu)/SAPO-34(left) and H(Cu)/SSZ-13 (right) catalysts calculated by NH<sub>3</sub> desorption at high temperatures
